# Supplementary material
Source: publisher site journal article supplement (https://www.degruyter.com/publication/journal_key/SPMA/downloadAsset/SPMA_CFP%20WSGT.pdf)
Supplement: Supplementary file 1 [file SPMA_CFP%20WSGT.pdf]

# Workshop on Spectral Graph Theory 2023

*In honor of Prof. Nair Abreu for her 73<sup>rd</sup> birthday*

## GUEST EDITORS

---

- Vilmar Trevisan, Universidade Federal do Rio Grande do Sul, Porto Alegre, Rio Grande do Sul, Brazil ([trevisan@mat.ufrgs.br](mailto:trevisan@mat.ufrgs.br))
- Renata Raposo Del Vecchio, Universidade Federal Fluminense, Niterói, Rio de Janeiro, Brazil ([rrdelvecchio@id.uff.br](mailto:rrdelvecchio@id.uff.br))
- Milica Andelic, Kuwait University, Kuwait ([milica.andelic@ku.edu.kw](mailto:milica.andelic@ku.edu.kw))

## DESCRIPTION

---

Special Matrices is pleased to announce a special issue devoted to the Workshop on Spectral Graph Theory 2023, in honor of Prof. Nair Abreu for her  $(70+3)^{\text{rd}}$  birthday, which will be held at Universidade Federal Fluminense in Niterói, Rio de Janeiro, Brazil, from October 24 to 27, 2023.

The aim of this workshop is to bring together young and experienced researchers in subjects related to spectral graph theory and its applications. We invite submissions based on talks given at the Workshop. Other papers not presented in the conference but in connection with the Workshop are welcome as well.

## HOW TO SUBMIT

---

Before submission authors should carefully read the [Instructions for Authors](#).

All submissions to the Special Issue must be made electronically via the Editorial Manager submission and tracking review system: [www.editorialmanager.com/spma](http://www.editorialmanager.com/spma)

All manuscripts will undergo the standard peer-review process (single blind, at least two independent reviewers). Submission of a manuscript implies that the work described has not

# Workshop on Spectral Graph Theory 2023

*In honor of Prof. Nair Abreu for her 73<sup>rd</sup> birthday*

been published before as a whole or as a part in any medium by the authors or anyone else and it is not under consideration for publication elsewhere. In case an original paper was published as part of conference proceedings.

When entering your submission (via online submission system), please choose the option "SI - WSGT23".

Deadline for submissions: February 28<sup>th</sup>, 2024
